# Supplementary material
Source: PubMed Central journal article supplement (PMC5068455)
Supplement: EBM660211_Supplementary_Table_1.pdf [file EBM660211_Supplementary_Table_1.pdf]

| Route of administration              | Experimental model                                                    | The effects                                                                                                                                                                                                                                                                                                                                                                                                                           | Ref. |
|--------------------------------------|-----------------------------------------------------------------------|---------------------------------------------------------------------------------------------------------------------------------------------------------------------------------------------------------------------------------------------------------------------------------------------------------------------------------------------------------------------------------------------------------------------------------------|------|
| Chronic (7 days), orally             | <i>In vitro</i> , isolated rat cardiac muscle                         | <ul style="list-style-type: none"> <li>decreased perfusion pressure</li> <li>increased systolic tension</li> <li>increased heart rate</li> </ul>                                                                                                                                                                                                                                                                                      | [31] |
|                                      | Myocardial infarction (MI) in rat                                     | <ul style="list-style-type: none"> <li>attenuation of the decrease in systolic tension after MI</li> <li>attenuation of the decrease in heart rate after MI</li> <li>prevention of vasoconstriction</li> <li>decreased the infarcted area</li> </ul>                                                                                                                                                                                  |      |
| Chronic (5 weeks), orally            | Streptozotocin-induced diabetic rats                                  | <ul style="list-style-type: none"> <li>suppression of the fall in blood pressure</li> <li>improvement in hemodynamic parameters (left ventricular contractility and relaxation)</li> </ul>                                                                                                                                                                                                                                            | [32] |
| Chronic (4 months), orally           | Model of atherosclerosis, apolipoprotein E knockout mice              | <ul style="list-style-type: none"> <li>inhibition of atherogenesis</li> <li>lack of change in the level of cholesterol and triglycerides</li> </ul>                                                                                                                                                                                                                                                                                   | [33] |
| Chronic (3 days), orally             | Model of endothelial dysfunction, salt-fed rats                       | <ul style="list-style-type: none"> <li>curtailment of endothelial dysfunction</li> <li>restoration of vasodilator responses to both acetylcholine and histamine</li> <li>lack of significant effect on arterial blood pressure</li> </ul>                                                                                                                                                                                             | [34] |
| Preincubation                        | <i>In vitro</i> , isolated aortic rings from rats on a high-salt diet | <ul style="list-style-type: none"> <li>restoration of vasodilator responses to both acetylcholine and histamine</li> <li>enhancement of NO availability</li> <li>reduction of oxidative stress</li> </ul>                                                                                                                                                                                                                             |      |
| Chronic (4 weeks), orally            | Myocardial infarction in rats                                         | <ul style="list-style-type: none"> <li>reduction in cardiac muscle hypertrophy</li> <li>reduction in infarct size</li> <li>elevation in left ventricular ejection fraction and left ventricular fractional shortening</li> <li>attenuation of collagen I and III, TGF-<math>\beta</math>1 (transforming growth factor-beta1) and TNF-<math>\alpha</math> expression</li> </ul>                                                        | [35] |
| Acute, subcutaneously                | Ischemia-induced acute renal injury in mice                           | <ul style="list-style-type: none"> <li>suppression of renal impairment</li> <li>decreased creatinine level</li> <li>prevention of leucocyte infiltration</li> <li>prevention of the release of the chemokine CXCL1</li> </ul>                                                                                                                                                                                                         | [36] |
| Chronic (4 weeks), intraperitoneally | Streptozotocin-induced diabetic rats                                  | <ul style="list-style-type: none"> <li>attenuation of the increase in serum glucose level</li> <li>correction of lipid profile (<math>\downarrow</math>TG - triglyceride, <math>\uparrow</math>HDL – high density lipoprotein)</li> <li>renal protective effects (decrease in blood urea nitrogen and protein urea)</li> </ul>                                                                                                        | [37] |
|                                      | <i>In vitro</i> , isolated heart                                      | <ul style="list-style-type: none"> <li>cardioprotective effect (<math>\uparrow</math>LVDP – left ventricular developed pressure, <math>\downarrow</math>LVEDP - left ventricular end-diastolic pressure)</li> </ul>                                                                                                                                                                                                                   |      |
| Chronic (4 months), orally           | Model of atherosclerosis, apolipoprotein E knockout mice              | <ul style="list-style-type: none"> <li>inhibition of atherogenesis</li> <li>increase plaque stability by decreasing number of macrophages and increasing smooth muscle cells plaque content</li> <li>diminished inflammatory mediators (MCP-1, IL-6, IL-12, SAA)</li> <li>inhibition of NADPH oxidase expression</li> <li>reduced expression of co-stimulatory molecules (CD40, CD86 and CD80) on antigen presenting cells</li> </ul> | [38] |
| Chronic (9 days), intraperitoneally  | Deoxycorticosterone-induced hypertensive rats                         | <ul style="list-style-type: none"> <li>dose-dependently decreased mean arterial blood pressure</li> <li>combination of low doses of aliskiren and</li> </ul>                                                                                                                                                                                                                                                                          | [39] |

|           |                                                                 |                                                                  |                                                                                                                                                                                                                                                                                                                                                                                                                      |      |
|-----------|-----------------------------------------------------------------|------------------------------------------------------------------|----------------------------------------------------------------------------------------------------------------------------------------------------------------------------------------------------------------------------------------------------------------------------------------------------------------------------------------------------------------------------------------------------------------------|------|
|           |                                                                 |                                                                  | AVE0991 produced synergistic blood pressure lowering effect                                                                                                                                                                                                                                                                                                                                                          |      |
|           | Chronic (28 days), orally                                       | 2K1C renovascular hypertensive rats                              | <ul style="list-style-type: none"> <li>restored the baroreflex sensitivity of both bradycardic and tachycardic components</li> <li>reduced heart weight, thickness of myocardial fibers, number of inflammatory cells and area of collagen deposition in the heart</li> <li>decreased inflammatory process and tissue area of collagen deposition in the clipped kidney</li> <li>anti-hypertensive effect</li> </ul> | [40] |
| CGEN-856S | Preincubation                                                   | <i>In vitro</i> , isolated aortic rings                          | <ul style="list-style-type: none"> <li>NO-dependent vasodilation</li> </ul>                                                                                                                                                                                                                                                                                                                                          | [41] |
|           | Perfusion                                                       | <i>In vitro</i> , isolated heart                                 | <ul style="list-style-type: none"> <li>reduction in the incidence and duration of reperfusion arrhythmias</li> <li>increased postischemic systolic tension</li> <li>increased coronary flow</li> </ul>                                                                                                                                                                                                               |      |
|           | Acute, intravenously                                            | Spontaneously hypertensive rats (SHRs)                           | <ul style="list-style-type: none"> <li>decreased mean arterial pressure</li> <li>transient and slight changes in HR (heart rate)</li> </ul>                                                                                                                                                                                                                                                                          |      |
|           | Chronic (7/14 days), osmotic minipumps implanted subcutaneously | Isoproterenol-induced hypertrophy, myocardial infarction in rats | <ul style="list-style-type: none"> <li>reduced the degree of ISO-induced hypertrophy</li> <li>attenuated the ISO-induced increase in collagen I, collagen III, and fibronectin deposition</li> <li>attenuated the MI-induced decrease in systolic tension</li> <li>decreased infarct area</li> </ul>                                                                                                                 | [42] |

**Table 1. Angiotensin-(1-7) analogues in the experimental studies.**
