# Supplementary material
Source: PubMed Central journal article supplement (PMC5068455)
Supplement: EBM660211_Supplementary_Table_2.pdf [file EBM660211_Supplementary_Table_2.pdf]

|                  | Route of administration                                                              | Experimental model                                                                                                       | The effects                                                                                                                                                                                                                                                                                                                                                                                                                                                                                                            | Ref. |
|------------------|--------------------------------------------------------------------------------------|--------------------------------------------------------------------------------------------------------------------------|------------------------------------------------------------------------------------------------------------------------------------------------------------------------------------------------------------------------------------------------------------------------------------------------------------------------------------------------------------------------------------------------------------------------------------------------------------------------------------------------------------------------|------|
| <b>rhACE2</b>    | Preincubation                                                                        | <i>In vitro</i> , HUVECs                                                                                                 | <ul style="list-style-type: none"> <li>increased NO contents in cell culture medium and the expression level of eNOS</li> <li>the involvement of PI3K/AKT signaling pathway in rhACE2's promotion of the activity of endothelial cell eNOS</li> </ul>                                                                                                                                                                                                                                                                  | [62] |
|                  | Chronic (2 weeks), orally                                                            | Wild type C57BL/6 mice infused with Ang II                                                                               | <ul style="list-style-type: none"> <li>reduced Ang II-induced hypertrophy and diastolic dysfunction</li> <li>antagonized Ang II-mediated myocardial fibrosis</li> <li>increased Akt and eNOS expression</li> </ul>                                                                                                                                                                                                                                                                                                     | [60] |
|                  | Chronic (2 weeks), intraperitoneally                                                 | Model of atherosclerosis, apolipoprotein E knockout mice, ACE2 knockout mice, ApoE/ACE knockout mice infused with Ang II | <ul style="list-style-type: none"> <li>increased in renal ACE2 and nephrin levels</li> <li>reversed Ang II-induced renal inflammation, superoxide generation, kidney dysfunction and adverse renal injury</li> </ul>                                                                                                                                                                                                                                                                                                   | [61] |
| <b>Xanthenon</b> | Acute, intravenously<br>Chronic (4 weeks), osmotic minipump implanted subcutaneously | WKY and SHR rats<br><br><i>In vitro</i> , isolated heart                                                                 | <ul style="list-style-type: none"> <li>especially in SHRs: a fall in arterial blood pressure and heart rate and increased response to bradykinine</li> <li>inhibition of perivascular and renal fibrosis in SHRs</li> <li>improvement of hemodynamic parameters</li> <li>inhibition of myocardial fibrosis in the SHRs</li> </ul>                                                                                                                                                                                      | [64] |
|                  | Chronic (4 weeks), osmotic minipumps implanted subcutaneously                        | Monocrotaline-induced pulmonary hypertension in rats                                                                     | <ul style="list-style-type: none"> <li>decreased right ventricular systolic pressure</li> <li>attenuation of interstitial fibrosis</li> <li>attenuation of increases in the levels of TGF<math>\beta</math> (transforming growth factor beta), TNF<math>\alpha</math> (tumor necrosis factor alpha), IL-1 (interleukin-1), IL-6 (interleukin-6), MCP-1 (monocyte chemotactic protein 1), NF-<math>\kappa</math>B (nuclear factor-kappa B)</li> <li>increased anti-inflammatory IL-10 (interleukin-10) level</li> </ul> | [65] |
|                  | Acute, intravenously                                                                 | FeCl <sub>3</sub> – induced venous thrombosis in WKY and SHR rats, mice                                                  | <ul style="list-style-type: none"> <li>decreased thrombus weight</li> <li>prolongation of the time needed for thrombus formation</li> <li>reduction in thrombus area</li> </ul>                                                                                                                                                                                                                                                                                                                                        | [66] |
|                  | Chronic (4 weeks), osmotic minipumps implanted subcutaneously                        | WKY and SHR rats                                                                                                         | <ul style="list-style-type: none"> <li>decreased cardiac collagen content</li> <li>reduction in ERK phosphorylation</li> <li>no change in cardiac AT1 protein levels</li> </ul>                                                                                                                                                                                                                                                                                                                                        | [67] |
|                  | Chronic (30 days), orally                                                            | Streptozotocin-induced diabetic rats                                                                                     | <ul style="list-style-type: none"> <li>improvement of cardiovascular autonomic dysfunction in diabetes (an increase in the baroreflex bradycardia sensibility and in the chemoreflex chronotropic response)</li> </ul>                                                                                                                                                                                                                                                                                                 | [68] |
| <b>DIZE</b>      | Chronic (2-4 weeks), orally                                                          | Monocrotaline-induced pulmonary hypertension in rats                                                                     | <ul style="list-style-type: none"> <li>inhibition of the pulmonary hypertension development</li> <li>decreased inflammatory cytokines level</li> <li>improved pulmonary vasoreactivity</li> <li>enhanced cardiac function</li> </ul>                                                                                                                                                                                                                                                                                   | [69] |

|                                                                    |                                                                                      |                                                                                                                                                                                                                                                                                                                                                      |      |
|--------------------------------------------------------------------|--------------------------------------------------------------------------------------|------------------------------------------------------------------------------------------------------------------------------------------------------------------------------------------------------------------------------------------------------------------------------------------------------------------------------------------------------|------|
| Acute, intravenously<br>Chronic (4 weeks), orally<br>Preincubation | Normotensive Wistar rats, 2K1C renovascular hypertensive rats, isolated aortic rings | <ul style="list-style-type: none"> <li>• decrease in BP with a compensatory increase in HR in normotensive rats</li> <li>• decrease in BP In 2K1C rats</li> <li>• prevented the development of cardiac hypertrophy induced by hypertension</li> <li>• the involvement of Mas activation and NO release in the vasodilator effects of DIZE</li> </ul> | [70] |
| Acute (3 days), intravenously                                      | Model of renal ischemia/reperfusion injury in rats                                   | <ul style="list-style-type: none"> <li>• decrease in blood urea nitrogen, creatinine, liver functional indices, serum malondialdehyde</li> <li>• increase in kidney nitrite levels</li> <li>• increase in creatinine and decrease in serum nitrite levels in female rats</li> </ul>                                                                  | [71] |
| Chronic (3 weeks), subcutaneously                                  | Model of atherosclerosis, apolipoprotein E knockout mice with erectile dysfunction   | <ul style="list-style-type: none"> <li>• improved hypercholesterolemia-induced corpus cavernosum (CC) injury</li> <li>• decreased collagen content within the CC</li> <li>• reduced ROS production and NADPH oxidase expression, and elevated nNOS and eNOS expression and NO bioavailability in the penis of ApoE(-/-) mice</li> </ul>              | [72] |
| Chronic (30 days), orally                                          | Male mice                                                                            | <ul style="list-style-type: none"> <li>• lowered body weight, serum cholesterol and triglycerides, epididymal and retroperitoneal adipose tissue weights</li> <li>• increased epididymal ACE2 and decreased ACE and angiotensinogen expression</li> <li>• decreased adipogenesis-related gene transcription, such as ACC and FAS mRNA</li> </ul>     | [73] |

**Table 2. rhACE2 and ACE2 activators in the experimental studies.**
