# Supplementary material
Source: PubMed Central journal article supplement (PMC5068455)
Supplement: EBM660211_Supplementary_Table_3.pdf [file EBM660211_Supplementary_Table_3.pdf]

| Route of administration                                       | Experimental model                                                                   | The effects                                                                                                                                                                                                                                                                                                                                                                                                                                                                                                                                                 | Ref.  |
|---------------------------------------------------------------|--------------------------------------------------------------------------------------|-------------------------------------------------------------------------------------------------------------------------------------------------------------------------------------------------------------------------------------------------------------------------------------------------------------------------------------------------------------------------------------------------------------------------------------------------------------------------------------------------------------------------------------------------------------|-------|
| Chronic (3 weeks), orally                                     | Transgenic rats overexpressing both the human renin and angiotensinogen genes (dTGR) | <ul style="list-style-type: none"> <li>reduced mortality</li> <li>lowered blood pressure</li> <li>ameliorated cardiac hypertrophy, albuminuria, cell infiltration, and matrix deposition in the heart and kidney</li> </ul>                                                                                                                                                                                                                                                                                                                                 | [110] |
| Chronic (10 weeks), orally                                    | Streptozotocin-induced diabetic rats                                                 | <ul style="list-style-type: none"> <li>reduced renal aldosterone content and urinary albumin excretion</li> <li>reduced mRNA expression of NF<math>\kappa</math> B, TNF<math>\alpha</math>, IL-6 and TGF<math>\beta</math></li> </ul>                                                                                                                                                                                                                                                                                                                       | [113] |
| Chronic (2 weeks), ICV minipumps infusion                     | Wistar rats infused with Na <sup>+</sup> -rich artificial cerebrospinal fluid        | <ul style="list-style-type: none"> <li>prevented the Na<sup>+</sup>-induced increase in hypothalamic aldosterone</li> <li>prevented most of the increases in resting BP and sympathoexcitatory and pressor responses to air stress and the baroreflex impairment</li> </ul>                                                                                                                                                                                                                                                                                 | [114] |
| Chronic (7 days and 12 weeks), orally                         | Model of post-myocardial infarction heart failure in rats                            | <ul style="list-style-type: none"> <li>improved left ventricular haemodynamics</li> <li>reduced LV hypertrophy and collagen accumulation to the same extent</li> <li>reduced the CHF-related enhancements in LV reactive oxygen species</li> <li>reduced-oxidized glutathione ratio and aortic nicotinamide adenine dinucleotide phosphate oxidase activity</li> <li>normalized the CHF-induced impairment of endothelium-dependent vasodilatation</li> <li>normalization of the CHF-induced reduction in AT<sub>2</sub> receptor protein levels</li> </ul> | [115] |
| Chronic (4 weeks), orally                                     | Uninephrectomized Sprague–Dawley rats, on high salt diet with Ang II infusion        | <ul style="list-style-type: none"> <li>reduced plasma aldosterone level</li> <li>prevention of the hypertensive response to uninephrectomy and high salt</li> <li>decrease hypertrophy and interstitial fibrosis of the kidney and heart caused by angiotensin II and high salt</li> <li>prevented Ang-II and salt induced increase in renal and heart PAI-1 mRNA protein expression</li> </ul>                                                                                                                                                             | [116] |
| Chronic, (2 weeks), ICV or subcutaneously minipumps infusion  | Dahl salt-sensitive rats on high salt diet                                           | <ul style="list-style-type: none"> <li>prevented the increase in hypothalamic aldosterone and 30 mmHg of the 50-mmHg BP increase induced by high salt intake</li> </ul>                                                                                                                                                                                                                                                                                                                                                                                     | [117] |
| Chronic, (4 weeks), ICV minipumps infusion                    | Model of myocardial infarction in rats                                               | <ul style="list-style-type: none"> <li>prevented post-MI increase of aldosterone in the hippocampus</li> <li>attenuated post-MI changes in left ventricular dimensions and ejection fraction</li> <li>improvement of haemodynamics parameters</li> <li>attenuated post-MI cardiac fibrosis and cardiomyocyte diameter</li> </ul>                                                                                                                                                                                                                            | [118] |
| Chronic (3-7 weeks), ICV or subcutaneously minipumps infusion | Dahl salt-sensitive rats on high salt diet                                           | <ul style="list-style-type: none"> <li>lowered blood pressure</li> </ul>                                                                                                                                                                                                                                                                                                                                                                                                                                                                                    | [119] |
| Chronic (10 weeks), orally                                    | Model of atherosclerosis, apolipoprotein E knockout mice on low salt diet            | <ul style="list-style-type: none"> <li>reduced lesion area to values similar to normal diet</li> <li>changes in the expression of the inflammation markers (C-reactive protein, monocyte chemoattractant protein-1, interleukin-6, nuclear factor kappa B and intercellular adhesion molecule-1)</li> </ul>                                                                                                                                                                                                                                                 | [120] |

|  |                                        |                                                    |                                                                                                                                                                                                                                                                                                                                                                                                 |       |
|--|----------------------------------------|----------------------------------------------------|-------------------------------------------------------------------------------------------------------------------------------------------------------------------------------------------------------------------------------------------------------------------------------------------------------------------------------------------------------------------------------------------------|-------|
|  | Chronic,<br>(7 days)<br>subcutaneously | Model of oxygen-<br>induced retinopathy in<br>rats | <ul style="list-style-type: none"> <li>• reduced neovascularization and neovascular tufts</li> <li>• normalized the increase in vascular endothelial growth factor mRNA</li> <li>• reduced OIR-induced increase in mRNA for tumor necrosis factor-<math>\alpha</math>, intercellular adhesion molecule 1, vascular cell adhesion molecule 1, and monocyte chemoattractant molecule 1</li> </ul> | [121] |
|--|----------------------------------------|----------------------------------------------------|-------------------------------------------------------------------------------------------------------------------------------------------------------------------------------------------------------------------------------------------------------------------------------------------------------------------------------------------------------------------------------------------------|-------|

**Table 3. Aldosterone synthase inhibitor (FAD286) in the experimental studies.**
